# Supplementary material
Source: publisher figshare collection journal article supplement (https://gsapubs.figshare.com/ndownloader/files/23301869)
Supplement: Supplementary file 1 [file 23301869]

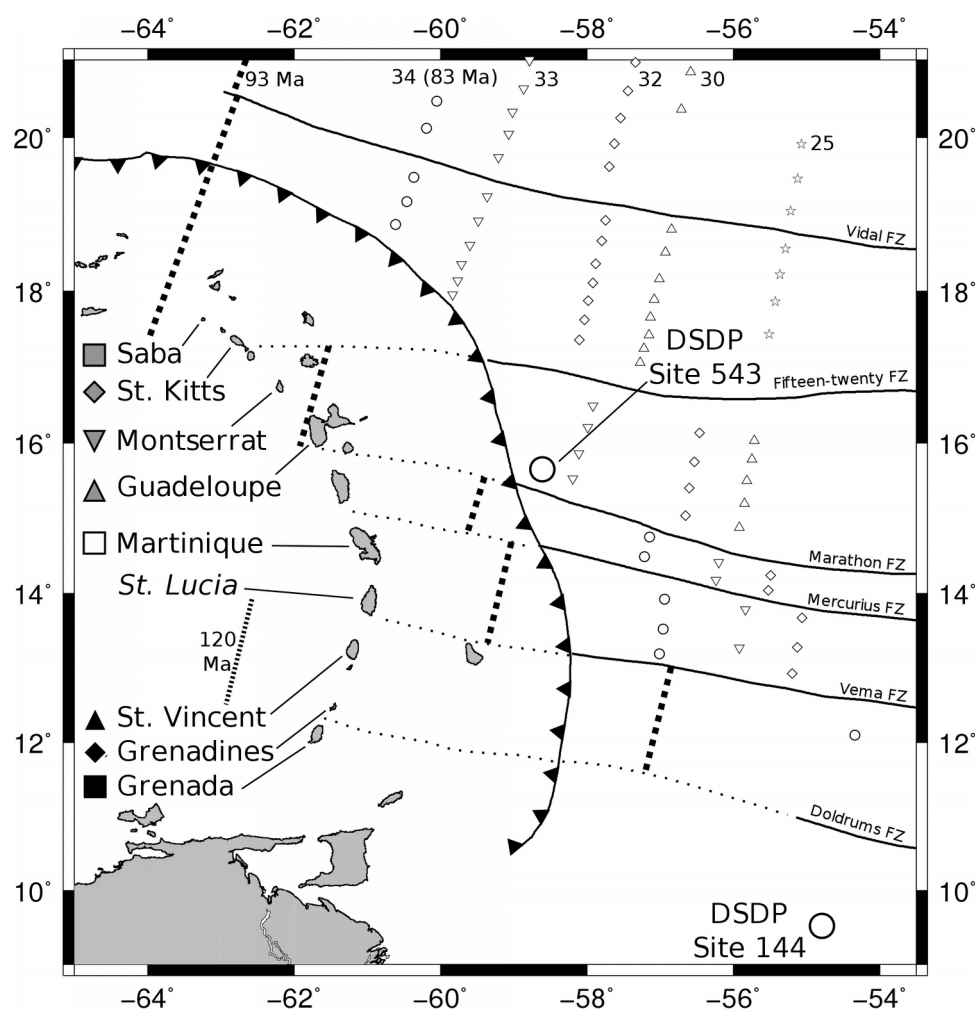

Figure DR1. Map of the Lesser Antilles arc. Oceanic fracture zones (FZ) and projections of the fracture zones into the subduction zone (from Schlaphorst et al., 2016) are shown by solid black lines and dotted black lines, respectively. Seafloor magnetic anomalies are plotted in circles (anomaly C34o, 83 Ma), inverted triangles (anomaly C33y, 79.075 Ma), diamonds (anomaly C32y, 73.004 Ma), triangles (anomaly C30y, 67.610 Ma) and stars (anomaly C25y, 56.391 Ma) (Müller et al., 1999, ages from Gee and Kent, 2007). Thick dotted lines indicate oceanic crust with an estimated age of 93 Ma. Oceanic crust older than 93 Ma should contain black shales deposited during OAE 2. The thin dotted line labeled '120 Ma' indicates a crustal age of 120 Ma (the age of OAE 1). The 93 Ma and 120 Ma crustal ages were derived by linear extrapolation from anomaly 34 assuming the same, constant spreading rate as between anomalies 34 and 33. A plate dip of 42.4 degrees (Syracuse et al. 2010) has been assumed for sections south of the Marathon FZ in order to extrapolate ages west of the trench. Plate dip was considered negligible for age extrapolation beneath the northern sections where the fracture zones are approximately parallel to the trench.

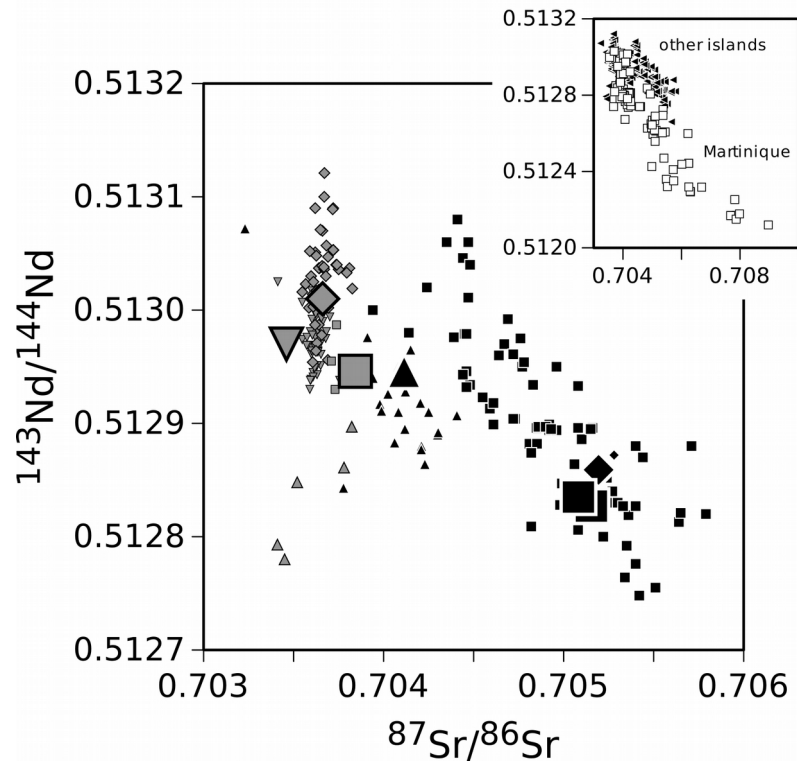

Figure DR2. Radiogenic isotope compositions of northern and southern Lesser Antilles arc lavas. Symbols indicate different islands as defined in Fig. DR1. Large symbols are from this study (Table DR1), small symbols are for previously published data (georoc.mpch-mainz.gwdg.de/). Open symbols in the inset are for samples from Martinique, closed symbols are for samples from other islands.

Table DR1: Mo, Pb, Sr and Nd isotope ratios in Lesser Antilles arc lavas and DSDP Site 144 sediments.

| island / site             | sample               | lithology                                    | Latitude   | Longitude  | phenocrysts present (a) | sediment unit; thickness (b) | Mo [µg/g] | Ce [µg/g] (c, d) | MgO [wt. %] (c, d) | $\delta^{98/95}\text{Mo}$ [‰] | 2 SE (e)          | $^{206}\text{Pb}/^{204}\text{Pb}$ (d) | 2 SE (e) | $^{207}\text{Pb}/^{204}\text{Pb}$ (d) | 2 SE (e) | $^{208}\text{Pb}/^{204}\text{Pb}$ (d) | 2 SE (e) | $^{87}\text{Sr}/^{86}\text{Sr}$ (c) | $^{143}\text{Nd}/^{144}\text{Nd}$ (c) |
|---------------------------|----------------------|----------------------------------------------|------------|------------|-------------------------|------------------------------|-----------|------------------|--------------------|-------------------------------|-------------------|---------------------------------------|----------|---------------------------------------|----------|---------------------------------------|----------|-------------------------------------|---------------------------------------|
| Lesser Antilles arc lavas |                      |                                              |            |            |                         |                              |           |                  |                    |                               |                   |                                       |          |                                       |          |                                       |          |                                     |                                       |
| Saba                      | LSS1                 | basaltic andesite                            | N 17°38.7' | W 63°12.8' | am, ol, pl              |                              | 1.10      | 12.77            | 7.37               | -0.082                        | 0.017             | 18.913                                | 0.0008   | 15.633                                | 0.0007   | 38.621                                | 0.0020   | 0.70371                             | -                                     |
| Saba                      | LSS3 (g)             | basalt                                       | N 17°38.7' | W 63°12.8' | am, ol, pl              |                              | 1.27      | 8.73             | 11.0               | -0.087                        | 0.021             |                                       |          |                                       |          |                                       |          | 0.70377                             | -                                     |
| Saba                      | LAS1                 | basalt                                       | N 17°38.8' | W 63°12.7' | cp, ol, pl              |                              | 1.01      | 12.31            | 8.01               | -0.051                        | 0.016             | 18.935                                | 0.0010   | 15.639                                | 0.0007   | 38.656                                | 0.0021   | 0.70384                             | 0.512946                              |
| St. Kitts                 | LSK2                 | basaltic andesite                            | N 17°24.1' | W 62°46.6' | cp, ol, pl              |                              | 1.04      | 9.55             | 4.20               | -0.089                        | 0.020             | 19.016                                | 0.0005   | 15.660                                | 0.0006   | 38.759                                | 0.0017   | 0.70366                             | 0.513010                              |
| Montserrat                | LSM07                | basaltic andesite                            | N 16°40.6' | W 62°10.5' | cp, ol, pl              |                              | 1.13      | 23.12            | 5.39               | -0.051                        | 0.015             | 18.917                                | 0.0014   | 15.615                                | 0.0019   | 38.593                                | 0.0069   | 0.70346                             | 0.512970                              |
| Guadeloupe                | GUAD511              | basalt                                       | -          | -          | NA                      |                              | 0.61      | 8.84             | 6.61               | -0.090                        | 0.020             | 19.166                                | 0.0004   | 15.667                                | 0.0005   | 38.835                                | 0.0014   | 0.70350                             | -                                     |
| Martinique                | LSM2                 | andesite                                     | N 14°43.6' | W 61°05.6' | NA                      |                              | 0.78      | 20.90            | 2.98               | -0.186                        | 0.016             | 19.620                                | 0.0006   | 15.789                                | 0.0008   | 39.441                                | 0.0030   | 0.70506                             | -                                     |
| St. Vincent               | LAV2                 | basaltic andesite                            | N 13°19.6' | W 61°10.8' | cp, ol, pl              |                              | 1.05      | 14.04            | 4.15               | 0.016                         | 0.021             | 19.314                                | 0.0009   | 15.720                                | 0.0007   | 38.925                                | 0.0022   | 0.70411                             | 0.512946                              |
| Grenadines                | WIC19                | basalt                                       | N 12°17.5' | W 61°35'   | NA                      |                              | 1.12      | 16.09            | 10.4               | 0.174                         | 0.018             | 19.703                                | 0.0009   | 15.792                                | 0.0011   | 39.254                                | 0.0032   | 0.70546                             | -                                     |
| Grenada                   | LSG5 (g)             | basalt                                       | N 12°13.7' | W 61°36.9' | cp, ol, pl              |                              | 0.26      | 57.78            | 8.55               | 0.097                         | 0.035             |                                       |          |                                       |          |                                       |          | 0.70424                             | -                                     |
| Grenada                   | LSG8 (g)             | basalt                                       | N 12°08.1' | W 61°44.9' | cp, ol, pl              |                              | 0.84      | 39.54            | 7.06               | 0.258                         | 0.017             |                                       |          |                                       |          |                                       |          | 0.70448                             | -                                     |
| Grenada                   | LAG2 (g)             | basalt                                       | N 12°08.1' | W 61°44.9' | cp, ol, pl              |                              | 1.15      | 39.05            | 6.86               | 0.336                         | 0.017             |                                       |          |                                       |          |                                       |          | 0.70448                             | 0.512934                              |
| Grenada                   | LAG3                 | basaltic andesite                            | N 12°14.1' | W 61°39.7' | am, cp, pl              |                              | 1.43      | 49.42            | 5.09               | 0.228                         | 0.017             | 19.451                                | 0.0010   | 15.745                                | 0.0010   | 39.008                                | 0.0031   | 0.70515                             | 0.512827                              |
| Grenada                   | LAG4                 | basalt                                       | N 12°03.7' | W 61°45.3' | ol, pl                  |                              | 0.85      | 18.11            | 17.3               | 0.153                         | 0.016             | 19.465                                | 0.0006   | 15.754                                | 0.0006   | 39.080                                | 0.0023   | 0.70508                             | 0.512835                              |
| rock standards            |                      |                                              |            |            |                         |                              |           |                  |                    |                               |                   |                                       |          |                                       |          |                                       |          |                                     |                                       |
|                           | JB-2                 | basaltic andesite                            |            |            |                         |                              | 0.89      |                  |                    | 0.062                         | 0.025 (n = 3) (f) |                                       |          |                                       |          |                                       |          |                                     |                                       |
|                           | BHVO-2               | basalt                                       |            |            |                         |                              | 4.16      |                  |                    | -0.059                        | 0.054 (n = 5) (f) | 18.646                                | 0.0014   | 15.491                                | 0.0014   | 38.207                                | 0.0044   |                                     |                                       |
|                           | AGV-2                | trachyandesite                               |            |            |                         |                              |           |                  |                    |                               |                   | 18.907                                | 0.0018   | 15.615                                | 0.0022   | 38.568                                | 0.0073   |                                     |                                       |
| DSDP Site 144 sediments   |                      |                                              |            |            |                         |                              |           |                  |                    |                               |                   |                                       |          |                                       |          |                                       |          |                                     |                                       |
| DSDP Site 144             | 144B-2-2W-11.5-13    | foram nanno chalk ooze                       |            |            |                         | 1; 120 m                     | 0.51      | 61.2             | 1.8                | -0.355                        | 0.028             | 19.135                                | 0.0019   | 15.743                                | 0.0019   | 39.271                                | 0.0040   | 0.71097                             | 0.511959                              |
| DSDP Site 144             | 144-3-1W-120-121     | slightly zeolitic calcereous mudstone        |            |            |                         | 2; 60 m                      | 0.11      | 27.1             | 0.8                | -0.555                        | 0.047             | 20.042                                | 0.0030   | 15.886                                | 0.0028   | 39.862                                | 0.0060   | 0.70869                             | 0.511730                              |
| DSDP Site 144             | 144A-5-1W-119-124    | zeolitic calcereous carbonaceous black shale |            |            |                         | 3; 60 m                      | 41.9      | 12.8             | 0.8                | 0.674                         | 0.030             | 21.273                                | 0.0041   | 15.882                                | 0.0029   | 39.423                                | 0.0070   | 0.70787                             | 0.511843                              |
| DSDP Site 144             | 144A-6-1W-90-93      | zeolitic calcereous carbonaceous black shale |            |            |                         | 3; 60 m                      | 51.0      | 13.7             | 0.7                | 0.522                         | 0.019             | 21.691                                | 0.0022   | 15.925                                | 0.0016   | 39.422                                | 0.0040   | 0.70788                             | 0.511832                              |
| DSDP Site 144             | 144-7-1W-125-130     | slightly quartzose carbonaceous clay         |            |            |                         | 5; 47 m                      | 0.20      | 56.3             | 1.6                | 0.129                         | 0.048             | 18.935                                | 0.0015   | 15.691                                | 0.0016   | 39.062                                | 0.0040   | 0.70914                             | 0.512105                              |
| DSDP Site 144             | average sediment (h) |                                              |            |            |                         | 327 m                        | 7.92      | 44.1             |                    | 0.543                         |                   | 19.601                                |          | 15.784                                |          | 39.307                                |          | 0.70851                             | 0.511990                              |

(a) am = amphibole, ol = olivine, pl = plagioclase, cp = clinopyroxene, NA = information not available.  
(b) sediment units and thickness as described in Hayes et al. (1972).  
(c) Ce and MgO concentrations, Sr and Nd isotope ratios in Lesser Antilles arc lavas are from van Soest (2000).

(d) Ce and MgO concentrations, Sr, Nd and Pb isotope ratios in DSDP Site 144 sediments are from Carpentier et al. (2009).

(e)  $2\text{ SE} = 2\sigma$  standard error (internal measurement error).

(f)  $n$  = number of individual analyses measured on separate dissolutions. The error represents the  $2\sigma$  standard deviation of the individual measurements.

(g) samples are considered contaminated and are not used in the figure or discussion. See analytical methods for detail.

(h) Bulk DSDP Site 144 sediment composition is the average for the different sediment units weighted by their sediment thickness. For this purpose, DSDP Site 144 Unit 3 (comprising OAE 2 and OAE 3) has been assumed to be made of 50% black shales and 50% sediments similar to those of unit 2, as indicated by the stratigraphic variation in total organic carbon content in this unit (Erbacher et al., 2004). Unit 4 has been assumed to be similar in  $\delta^{98/95}\text{Mo}$  to unit 2 because both are dominantly made of marl. Average isotope ratios were additionally weighted by the concentration of the respective element in the sediment unit.

## Analytical methods

Mo isotope ratios and Mo concentrations were measured using a  $^{97}\text{Mo}$ - $^{100}\text{Mo}$  double spike following the methods described in Freymuth et al. (2015) and Willbold et al. (2016). Mo isotope ratios are reported relative to NIST 3134. The rock standards BHVO-2 and JB-2 were analysed together with the samples. BHVO-2 appears to be isotopically heterogeneous (see Willbold et al., 2016) and we therefore consider the replicate analyses of JB-2 more appropriate as a measure of external reproducibility.

Powders used for Pb isotope analyses were leached in 6 M HCl for 1 hour at 100°C prior to dissolution in HF/HNO<sub>3</sub>. Pb was separated from the matrix on AG1-X8 resin using the approach of Strelow and Van der Walt (1981) further described by Galer (1986). Pb isotope ratios were measured using a Neptune MC-ICP-MS at the University of Bristol and corrected for instrumental mass bias by sample-standard bracketing with NBS 981. Ratios assumed for NBS 981 are  $^{206}\text{Pb}/^{204}\text{Pb} = 16.9416$ ,  $^{207}\text{Pb}/^{204}\text{Pb} = 15.4998$ ,  $^{208}\text{Pb}/^{204}\text{Pb} = 36.7249$  (Baker et al., 2004).

Pb contamination has previously been described for Lesser Antilles arc lava samples (Thirlwall et al., 1996). We therefore performed additional Pb isotope measurements on sample powders that were not previously leached. Pb isotope ratios measured on leached and unleached powders usually agreed within 1 %. For these samples we assume the Pb isotope ratios measured on leached powders to reflect magmatic values. Pb contamination of samples for which this was not the case was considered too severe for the leaching to fully remove the contaminant. These samples are reported in italics in Table DR1 and were not plotted in Fig. 2. Mo isotope ratios in these samples are similar to those of other samples from the same islands suggesting that Mo was likely unaffected by contamination. We nevertheless took a conservative approach and did not include these samples in plots and the discussion.

## Additional References

- Baker, J., Peate, D., Waight, T., and Meyzen, C., 2004, Pb isotopic analysis of standards and samples using a  $^{207}\text{Pb}$ - $^{204}\text{Pb}$  double spike and thallium to correct for mass bias with a double-focusing MC-ICP-MS: *Chemical Geology*, v. 211, no. 3–4, p. 275–303.
- Erbacher, J., Mosher, D.C., Malone, M.J., and et al. (Eds.), 2004, *Proceedings of the Ocean Drilling Program, 207 Initial Reports: Ocean Drilling Program*.
- Galer, S.J.G., 1986, *Chemical and isotopic studies of crust-mantle differentiation and the generation of mantle heterogeneity*: University of Cambridge.
- Gee, J.S., and Kent, D.V., 2007, 5.12 - Source of Oceanic Magnetic Anomalies and the Geomagnetic Polarity Timescale A2 - Schubert, Gerald, *in* *Treatise on Geophysics* (Second Edition), Elsevier, Oxford, p. 419–460.
- Müller, R.D., Royer, J.-Y., Cande, S.C., Roest, W.R., and Maschenkov, S., 1999, Chapter 2 New constraints on the late cretaceous/tertiary plate tectonic evolution of the caribbean, *in* Mann, P. ed., *Sedimentary Basins of the World, Caribbean Basins*, Elsevier, p. 33–59.
- Schlaphorst, D., Kendall, J.-M., Collier, J.S., Verdon, J.P., Blundy, J., Baptie, B., Latchman, J.L., Massin, F., and Bouin, M.-P., 2016, Water, oceanic fracture zones and the lubrication of subducting plate boundaries—insights from seismicity: *Geophysical Journal International*, v. 204, no. 3, p. 1405–1420, doi: 10.1093/gji/ggv509.
- Strelow, F.W.E., and Van der Walt, T.N., 1981, Quantitative separation of bismuth from lead, cadmium, and other elements by anion exchange chromatography with hydrobromic acid-nitric acid elution: *Analytical Chemistry*, v. 53, no. 11, p. 1637–1640, doi: 10.1021/ac00234a021.
- Willbold, M., Hibbert, K., Lai, Y.-J., Freymuth, H., Hin, R.C., Coath, C., Vils, F., and Elliott, T., 2016, High-Precision Mass-Dependent Molybdenum Isotope Variations in Magmatic Rocks Determined by Double-Spike MC-ICP-MS: *Geostandards and Geoanalytical Research*, p. n/a-n/a, doi: 10.1111/ggr.12109.
